# Supplementary material for: The Associations between Diet and Socioeconomic Disparities and the Intestinal Microbiome in Preadolescence
Source: MDPI journal article supplement (doi:10.3390/nu13082645), 2021-07-30
Supplement: s1 [file s1]

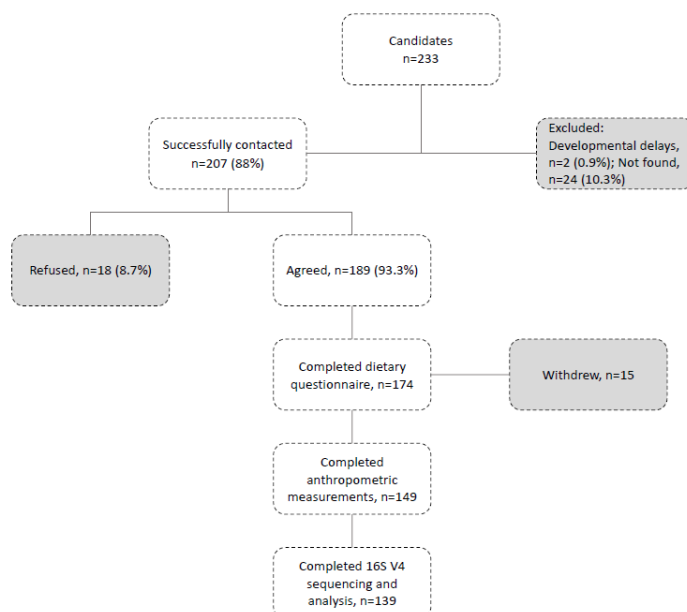

**Supplementary Figure S1.** Flow chart of enrollment and data collection.

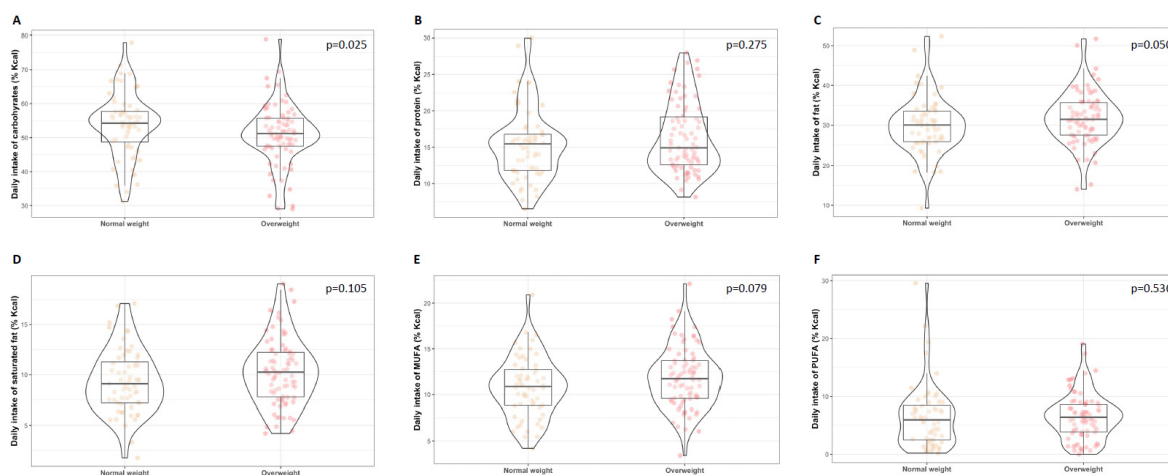

**Supplementary Figure S2.** Dietary intake in normal weight compared to overweight and obese participants. Children that were overweight/obese consumed (A) significantly less carbohydrates compared to their normal weight counterparts ( $p = 0.027$ ); (B) a relatively similar percentage of calories from protein ( $p = 0.275$ ); (C) a higher percentage of calories from fat ( $p = 0.050$ ); (D) saturated fat ( $p = 0.105$ ); and (E) MUFAs ( $p = 0.079$ ). Intake of PUFAs was relatively similar ( $p = 0.536$ ).

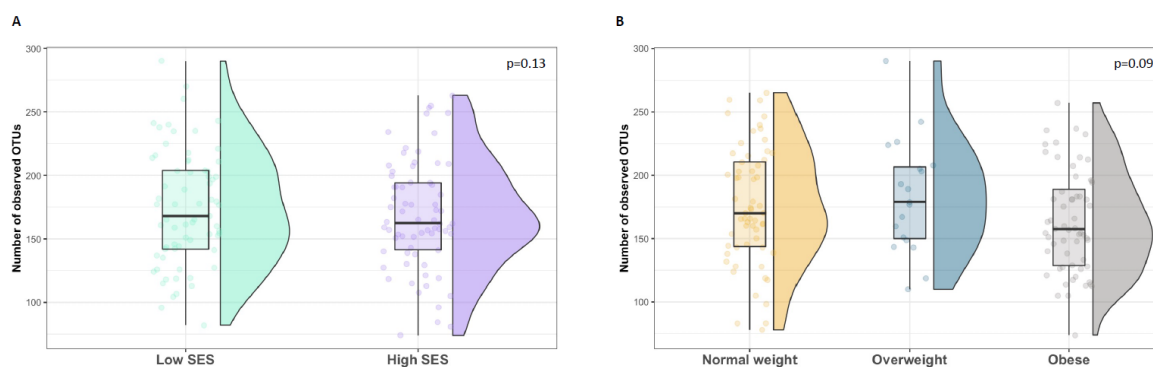

**Supplementary Figure S3.** (A) No significant association between alpha diversity and socioeconomic scores (Observed OTUs  $p = 0.13$ ). (B) A trend of decreased bacterial richness among obese participants compared to their normal weight and overweight counterparts (observed OTUs  $p = 0.09$  for both pairwise comparisons).

Supplementary Table S1. Bacterial composition in the whole cohort.

|                                              | Unweighted UniFrac |           |       |       |         | Weighted UniFrac |           |       |       |         |
|----------------------------------------------|--------------------|-----------|-------|-------|---------|------------------|-----------|-------|-------|---------|
|                                              | Df                 | SumofSqrs | R2    | F     | p-value | Df               | SumofSqrs | R2    | F     | p-value |
| Body mass index Z-score                      | 1                  | 0.257     | 0.011 | 1.558 | 0.038   | 1                | 0.038     | 0.013 | 1.914 | 0.074   |
| Socioeconomic status score                   | 1                  | 1.192     | 0.05  | 7.229 | < 0.001 | 1                | 0.086     | 0.03  | 4.268 | < 0.001 |
| Fat intake (% Kcal)                          | 1                  | 0.198     | 0.008 | 1.204 | 0.198   | 1                | 0.006     | 0.002 | 0.317 | 0.93    |
| Poly unsaturated fatty acids intake (% Kcal) | 1                  | 0.286     | 0.012 | 1.735 | 0.014   | 1                | 0.017     | 0.006 | 0.867 | 0.479   |
| Mono unsaturated fatty acids intake (% Kcal) | 1                  | 0.154     | 0.006 | 0.934 | 0.52    | 1                | 0.015     | 0.005 | 0.755 | 0.564   |
| Saturated fatty acids intake (% Kcal)        | 1                  | 0.205     | 0.008 | 1.242 | 0.155   | 1                | 0.004     | 0.002 | 0.219 | 0.972   |
| Protein intake (% Kcal)                      | 1                  | 0.157     | 0.007 | 0.952 | 0.495   | 1                | 0.027     | 0.009 | 1.325 | 0.217   |
| Carbohydrates intake (% Kcal)                | 1                  | 0.146     | 0.006 | 0.884 | 0.611   | 1                | 0.012     | 0.004 | 0.613 | 0.705   |
| Residual                                     | 130                | 21.43     | 0.89  |       |         | 130              | 2.619     | 0.927 |       |         |
| Total                                        | 138                | 24.02     | 1     |       |         | 138              | 2.826     | 1     |       |         |

Adonis2 was implemented, with 1,000 permutations.

Supplementary Table S2. Maaslin2 results for the whole cohort.

|                                                                                                        |                               |        |       |     |       |       |
|--------------------------------------------------------------------------------------------------------|-------------------------------|--------|-------|-----|-------|-------|
| k_Bacteria.p_Actinobacteria.c_Coriobacteriia.o_Coriobacteriales.f_Coriobacteriaceae.g_                 | Socioeconomic status score    | -0.280 | 0.089 | 134 | 0.002 | 0.022 |
| k_Bacteria.p_Firmicutes.c_Erysipelotrichi.o_Erysipelotrichales.f_Erysipelotrichaceae.g_Eubacterium     | Socioeconomic status score    | -0.467 | 0.161 | 107 | 0.004 | 0.044 |
| k_Bacteria.p_Firmicutes.c_Clostridia.o_Clostridiales.f_Lachnospiraceae.g_Dorea                         | Socioeconomic status score    | -0.129 | 0.045 | 139 | 0.004 | 0.050 |
| k_Bacteria.p_Actinobacteria.c_Coriobacteriia.o_Coriobacteriales.f_Coriobacteriaceae.g_Adlercreutzia    | Socioeconomic status score    | 0.415  | 0.151 | 84  | 0.006 | 0.061 |
| k_Bacteria.p_Firmicutes.c_Clostridia.o_Clostridiales.f_Ruminococcaceae.g_Ruminococcus                  | Socioeconomic status score    | 0.212  | 0.079 | 139 | 0.008 | 0.072 |
| k_Bacteria.p_Firmicutes.c_Clostridia.o_Clostridiales.f_Clostridiaceae.g_Clostridium sensu stricto      | Body mass index Z-score       | 0.313  | 0.009 | 40  | 0.000 | 0.000 |
| k_Bacteria.p_Firmicutes.c_Erysipelotrichi.o_Erysipelotrichales.f_Erysipelotrichaceae.g_Catenibacterium | Body mass index Z-score       | -0.094 | 0.007 | 58  | 0.000 | 0.000 |
| k_Bacteria.p_Actinobacteria.c_Coriobacteriia.o_Coriobacteriales.f_Coriobacteriaceae.g_                 | Body mass index Z-score       | -0.171 | 0.022 | 51  | 0.000 | 0.000 |
| k_Bacteria.p_Bacteroidetes.c_Bacteroidia.o_Bacteroidales.f_Rikenellaceae.g_                            | Body mass index Z-score       | -0.741 | 0.217 | 54  | 0.001 | 0.010 |
| k_Bacteria.p_Firmicutes.c_Clostridia.o_Clostridiales.f_Christensenellaceae.g_                          | Body mass index Z-score       | -0.753 | 0.220 | 77  | 0.001 | 0.010 |
| k_Bacteria.p_Actinobacteria.c_Coriobacteriia.o_Coriobacteriales.f_Coriobacteriaceae.g_Collinsella      | Body mass index Z-score       | 0.332  | 0.118 | 127 | 0.005 | 0.050 |
| k_Bacteria.p_Firmicutes.c_Clostridia.o_Clostridiales.f_g_                                              | Body mass index Z-score       | -0.311 | 0.110 | 131 | 0.005 | 0.050 |
| k_Bacteria.p_Firmicutes.c_Erysipelotrichi.o_Erysipelotrichales.f_Erysipelotrichaceae.g_Bulleidia       | Body mass index Z-score       | -0.734 | 0.273 | 46  | 0.007 | 0.070 |
| k_Bacteria.p_Bacteroidetes.c_Bacteroidia.o_Bacteroidales.f_Odoribacteraceae.g_Odoribacter              | Body mass index Z-score       | -0.562 | 0.210 | 53  | 0.007 | 0.071 |
| k_Bacteria.p_Firmicutes.c_Erysipelotrichi.o_Erysipelotrichales.f_Erysipelotrichaceae.g_Catenibacterium | Carbohydrates intake (% Kcal) | 1.491  | 0.046 | 58  | 0.000 | 0.000 |
| k_Bacteria.p_Firmicutes.c_Clostridia.o_Clostridiales.f_Clostridiaceae.g_Clostridium sensu stricto      | Carbohydrates intake (% Kcal) | 0.628  | 0.051 | 40  | 0.000 | 0.000 |
| k_Bacteria.p_Proteobacteria.c_Gammaproteobacteria.o_Pasteurellales.f_Pasteurellaceae                   | Carbohydrates intake (% Kcal) | 4.792  | 1.543 | 57  | 0.002 | 0.025 |
| k_Bacteria.p_Firmicutes.c_Bacilli.o_Lactobacillales.f_Streptococcaceae.g_Lactococcus                   | Carbohydrates intake (% Kcal) | 4.946  | 1.626 | 47  | 0.002 | 0.030 |

|                                                                                                        |                                              |        |       |     |       |       |
|--------------------------------------------------------------------------------------------------------|----------------------------------------------|--------|-------|-----|-------|-------|
| k_Bacteria.p_Firmicutes.c_Clostridia.o_Clostridiales.f_Lachnospiraceae.g_Ruminococcus                  | Carbohydrates intake (% Kcal)                | -4.880 | 1.646 | 49  | 0.003 | 0.036 |
| k_Bacteria.p_Firmicutes.c_Clostridia.o_Clostridiales.f_Lachnospiraceae.g_Lachnospira                   | Carbohydrates intake (% Kcal)                | 1.959  | 0.736 | 125 | 0.008 | 0.072 |
| k_Bacteria.p_Firmicutes.c_Erysipelotrichi.o_Erysipelotrichales.f_Erysipelotrichaceae.g_Clostridium     | Carbohydrates intake (% Kcal)                | -4.379 | 1.718 | 34  | 0.011 | 0.089 |
| k_Bacteria.p_Firmicutes.c_Erysipelotrichi.o_Erysipelotrichales.f_Erysipelotrichaceae.g_Catenibacterium | Protein intake (% Kcal)                      | 0.995  | 0.026 | 58  | 0.000 | 0.000 |
| k_Bacteria.p_Firmicutes.c_Clostridia.o_Clostridiales.f_Clostridiaceae.g_Clostridium sensu stricto      | Protein intake (% Kcal)                      | 0.668  | 0.029 | 40  | 0.000 | 0.000 |
| k_Bacteria.p_Firmicutes.c_Bacilli.o_Lactobacillales.f_Streptococcaceae.g_Lactococcus                   | Protein intake (% Kcal)                      | 3.053  | 0.945 | 47  | 0.001 | 0.018 |
| k_Bacteria.p_Firmicutes.c_Clostridia.o_Clostridiales.f_Lachnospiraceae.g_Ruminococcus                  | Protein intake (% Kcal)                      | -3.081 | 0.961 | 49  | 0.001 | 0.018 |
| k_Bacteria.p_Proteobacteria.c_Gammaproteobacteria.o_Pasteurellales.f_Pasteurellaceae                   | Protein intake (% Kcal)                      | 2.730  | 0.898 | 57  | 0.002 | 0.030 |
| k_Bacteria.p_Firmicutes.c_Erysipelotrichi.o_Erysipelotrichales.f_Erysipelotrichaceae.g_Clostridium     | Protein intake (% Kcal)                      | -2.730 | 1.008 | 34  | 0.007 | 0.068 |
| k_Bacteria.p_Firmicutes.c_Erysipelotrichi.o_Erysipelotrichales.f_Erysipelotrichaceae.g_Catenibacterium | Fat intake (% Kcal)                          | 0.709  | 0.035 | 58  | 0.000 | 0.000 |
| k_Bacteria.p_Actinobacteria.c_Coriobacteriia.o_Coriobacteriales.f_Coriobacteriaceae.                   | Fat intake (% Kcal)                          | -0.460 | 0.098 | 51  | 0.000 | 0.000 |
| k_Bacteria.p_Proteobacteria.c_Betaproteobacteria.o_Burkholderiales.f_Comamonadaceae.g_Delftia          | Fat intake (% Kcal)                          | 2.419  | 0.802 | 43  | 0.003 | 0.031 |
| k_Bacteria.p_Firmicutes.c_Clostridia.o_Clostridiales.f_Clostridiaceae.g_Clostridium sensu stricto      | Fat intake (% Kcal)                          | -0.129 | 0.043 | 40  | 0.003 | 0.033 |
| k_Bacteria.p_Proteobacteria.c_Gammaproteobacteria.o_Pasteurellales.f_Pasteurellaceae                   | Fat intake (% Kcal)                          | 3.516  | 1.227 | 57  | 0.004 | 0.047 |
| k_Bacteria.p_Bacteroidetes.c_Bacteroidia.o_Bacteroidales.f_Barnesiellaceae.g.                          | Fat intake (% Kcal)                          | 2.730  | 1.064 | 62  | 0.010 | 0.085 |
| k_Bacteria.p_Firmicutes.c_Clostridia.o_Clostridiales.f_Lachnospiraceae.g_Ruminococcus                  | Fat intake (% Kcal)                          | -3.387 | 1.318 | 49  | 0.010 | 0.085 |
| k_Bacteria.p_Firmicutes.c_Clostridia.o_Clostridiales.f_Clostridiaceae.g_Clostridium sensu stricto      | Saturated fatty acids intake (% Kcal)        | 0.448  | 0.017 | 40  | 0.000 | 0.000 |
| k_Bacteria.p_Actinobacteria.c_Coriobacteriia.o_Coriobacteriales.f_Coriobacteriaceae.                   | Saturated fatty acids intake (% Kcal)        | 0.268  | 0.038 | 51  | 0.000 | 0.000 |
| k_Bacteria.p_Firmicutes.c_Erysipelotrichi.o_Erysipelotrichales.f_Erysipelotrichaceae.g_Catenibacterium | Saturated fatty acids intake (% Kcal)        | 0.045  | 0.013 | 58  | 0.000 | 0.008 |
| k_Bacteria.p_Bacteroidetes.c_Bacteroidia.o_Bacteroidales.f_Barnesiellaceae.g.                          | Saturated fatty acids intake (% Kcal)        | -1.093 | 0.403 | 62  | 0.007 | 0.068 |
| k_Bacteria.p_Firmicutes.c_Clostridia.o_Clostridiales.f_Mogibacteriaceae.g_Mogibacterium                | Saturated fatty acids intake (% Kcal)        | 1.205  | 0.457 | 53  | 0.008 | 0.075 |
| k_Bacteria.p_Bacteroidetes.c_Bacteroidia.o_Bacteroidales.f_Bacteroidaceae.g_Bacteroides                | Saturated fatty acids intake (% Kcal)        | -0.549 | 0.214 | 134 | 0.010 | 0.085 |
| k_Bacteria.p_Firmicutes.c_Clostridia.o_Clostridiales.f_Clostridiaceae.g_Clostridium sensu stricto      | Poly unsaturated fatty acids intake (% Kcal) | 0.305  | 0.012 | 40  | 0.000 | 0.000 |
| k_Bacteria.p_Firmicutes.c_Erysipelotrichi.o_Erysipelotrichales.f_Erysipelotrichaceae.g_Catenibacterium | Poly unsaturated fatty acids intake (% Kcal) | -0.120 | 0.011 | 58  | 0.000 | 0.000 |
| k_Bacteria.p_Proteobacteria.c_Betaproteobacteria.o_Burkholderiales.f_Comamonadaceae.g_Delftia          | Poly unsaturated fatty acids intake (% Kcal) | -3.174 | 0.365 | 43  | 0.000 | 0.000 |
| k_Bacteria.p_Actinobacteria.c_Coriobacteriia.o_Coriobacteriales.f_Coriobacteriaceae.                   | Poly unsaturated fatty acids intake (% Kcal) | 0.120  | 0.027 | 51  | 0.000 | 0.000 |
| k_Bacteria.p_Bacteroidetes.c_Bacteroidia.o_Bacteroidales.f_Barnesiellaceae.g.                          | Poly unsaturated fatty acids intake (% Kcal) | -1.268 | 0.315 | 62  | 0.000 | 0.001 |
| k_Bacteria.p_Firmicutes.c_Clostridia.o_Clostridiales.f_Lachnospiraceae.g_Lachnobacterium               | Poly unsaturated fatty acids intake (% Kcal) | 1.714  | 0.456 | 33  | 0.000 | 0.004 |
| k_Bacteria.p_Firmicutes.c_Clostridia.o_Clostridiales.f_Mogibacteriaceae.g_Mogibacterium                | Poly unsaturated fatty acids intake (% Kcal) | 0.886  | 0.342 | 53  | 0.010 | 0.085 |
| k_Bacteria.p_Firmicutes.c_Erysipelotrichi.o_Erysipelotrichales.f_Erysipelotrichaceae.g_Catenibacterium | Mono unsaturated fatty acids intake (% Kcal) | 0.308  | 0.013 | 58  | 0.000 | 0.000 |
| d_Bacteria.p_Firmicutes;c_Clostridia;o_Clostridiales;f_Clostridiaceae;g_Clostridium sensu stricto      | Mono unsaturated fatty acids intake (% Kcal) | -0.375 | 0.017 | 40  | 0.000 | 0.000 |
| k_Bacteria.p_Bacteroidetes.c_Bacteroidia.o_Bacteroidales.f_Barnesiellaceae.g.                          | Mono unsaturated fatty acids intake (% Kcal) | -1.354 | 0.417 | 62  | 0.001 | 0.017 |
| k_Bacteria.p_Firmicutes.c_Clostridia.o_Clostridiales.f_Lachnospiraceae.g_Lachnospira                   | Mono unsaturated fatty acids intake (% Kcal) | 0.612  | 0.226 | 125 | 0.007 | 0.069 |
| k_Bacteria.p_Actinobacteria.c_Coriobacteriia.o_Coriobacteriales.f_Coriobacteriaceae.                   | Mono unsaturated fatty acids intake (% Kcal) | -0.104 | 0.039 | 51  | 0.008 | 0.074 |
| k_Bacteria.p_Firmicutes.c_Clostridia.o_Clostridiales.f_Christensenellaceae.g.                          | Mono unsaturated fatty acids intake (% Kcal) | -1.012 | 0.392 | 77  | 0.010 | 0.085 |

Supplementary Table S3. Bacterial composition in the low SES group.

|                                              | Unweighted UniFrac |           |       |       |         | Weighted UniFrac |           |       |       |         |
|----------------------------------------------|--------------------|-----------|-------|-------|---------|------------------|-----------|-------|-------|---------|
|                                              | Df                 | SumofSqrs | R2    | F     | p-value | Df               | SumofSqrs | R2    | F     | p-value |
| Body mass index Z-score                      | 2                  | 0.430     | 0.041 | 1.405 | 0.046   | 2                | 0.079     | 0.061 | 2.175 | 0.023   |
| Fat intake (% Kcal)                          | 1                  | 0.199     | 0.019 | 1.297 | 0.126   | 1                | 0.008     | 0.006 | 0.450 | 0.848   |
| Poly unsaturated fatty acids intake (% Kcal) | 1                  | 0.167     | 0.016 | 1.091 | 0.344   | 1                | 0.027     | 0.021 | 1.493 | 0.181   |
| Mono unsaturated fatty acids intake (% Kcal) | 1                  | 0.118     | 0.011 | 0.771 | 0.819   | 1                | 0.017     | 0.013 | 0.947 | 0.442   |
| Saturated fatty acids intake (% Kcal)        | 1                  | 0.133     | 0.012 | 0.865 | 0.651   | 1                | 0.017     | 0.013 | 0.917 | 0.435   |
| Protein intake (% Kcal)                      | 1                  | 0.233     | 0.022 | 1.521 | 0.049   | 1                | 0.041     | 0.032 | 2.262 | 0.071   |
| Carbohydrates intake (% Kcal)                | 1                  | 0.135     | 0.013 | 0.883 | 0.639   | 1                | 0.014     | 0.010 | 0.745 | 0.571   |
| Residual                                     | 60                 | 9.189     | 0.867 | NA    | NA      | 60               | 1.091     | 0.843 | NA    | NA      |
| Total                                        | 68                 | 10.603    | 1.000 | NA    | NA      | 68               | 1.293     | 1.000 | NA    | NA      |

Adonis2 was implemented, with 1,000 permutations.

Supplementary Table S4. Maaslin2 results for the low SES group.

| feature                                                                                                  | metadata                                     | coef   | stderr | N  | N.not.0 | pval  | qval  |
|----------------------------------------------------------------------------------------------------------|----------------------------------------------|--------|--------|----|---------|-------|-------|
| k_Bacteria.p_Bacteroidetes.c_Bacteroidia.o_Bacteroidales.f_Paraprevotellaceae.g_                         | Body mass index Z-score                      | -0.673 | 0.052  | 70 | 18      | 0.000 | 0.000 |
| k_Bacteria.p_Firmicutes.c_Clostridia.o_Clostridiales.f_Mogibacteriaceae.g_Mogibacterium                  | Body mass index Z-score                      | -0.113 | 0.026  | 70 | 31      | 0.000 | 0.000 |
| k_Bacteria.p_Actinobacteria.c_Coriobacteriia.o_Coriobacteriales.f_Coriobacteriaceae.g_Atopobium parvulum | Body mass index Z-score                      | 0.896  | 0.302  | 70 | 25      | 0.003 | 0.032 |
| k_Bacteria.p_Firmicutes.c_Clostridia.o_Clostridiales.f_Mogibacteriaceae.g_                               | Body mass index Z-score                      | 0.307  | 0.110  | 70 | 67      | 0.005 | 0.047 |
| k_Bacteria.p_Bacteroidetes.c_Bacteroidia.o_Bacteroidales.f_Odoribacteraceae.g_Odoribacter                | Body mass index Z-score                      | -0.794 | 0.307  | 70 | 21      | 0.010 | 0.077 |
| k_Bacteria.p_Firmicutes.c_Clostridia.o_Clostridiales.f_Mogibacteriaceae.g_Mogibacterium                  | Carbohydrates intake (% Kcal)                | 1.850  | 0.169  | 70 | 31      | 0.000 | 0.000 |
| k_Bacteria.p_Bacteroidetes.c_Bacteroidia.o_Bacteroidales.f_Paraprevotellaceae.g_                         | Carbohydrates intake (% Kcal)                | 2.926  | 0.269  | 70 | 18      | 0.000 | 0.000 |
| k_Bacteria.p_Actinobacteria.c_Coriobacteriia.o_Coriobacteriales.f_Coriobacteriaceae.g_                   | Carbohydrates intake (% Kcal)                | -1.535 | 0.143  | 70 | 33      | 0.000 | 0.000 |
| k_Bacteria.p_Bacteroidetes.c_Bacteroidia.o_Bacteroidales.f_Paraprevotellaceae.g_                         | Protein intake (% Kcal)                      | 2.080  | 0.169  | 70 | 18      | 0.000 | 0.000 |
| k_Bacteria.p_Actinobacteria.c_Coriobacteriia.o_Coriobacteriales.f_Coriobacteriaceae.g_                   | Protein intake (% Kcal)                      | -1.083 | 0.094  | 70 | 33      | 0.000 | 0.000 |
| k_Bacteria.p_Firmicutes.c_Clostridia.o_Clostridiales.f_Mogibacteriaceae.g_Mogibacterium                  | Protein intake (% Kcal)                      | 1.059  | 0.105  | 70 | 31      | 0.000 | 0.000 |
| k_Bacteria.p_Bacteroidetes.c_Bacteroidia.o_Bacteroidales.f_Paraprevotellaceae.g_                         | Fat intake (% Kcal)                          | 2.533  | 0.155  | 70 | 18      | 0.000 | 0.000 |
| k_Bacteria.p_Actinobacteria.c_Coriobacteriia.o_Coriobacteriales.f_Coriobacteriaceae.g_                   | Fat intake (% Kcal)                          | -1.126 | 0.102  | 70 | 33      | 0.000 | 0.000 |
| k_Bacteria.p_Firmicutes.c_Clostridia.o_Clostridiales.f_Mogibacteriaceae.g_Mogibacterium                  | Fat intake (% Kcal)                          | 0.912  | 0.123  | 70 | 31      | 0.000 | 0.000 |
| k_Bacteria.p_Firmicutes.c_Clostridia.o_Clostridiales.f_Mogibacteriaceae.g_Mogibacterium                  | Saturated fatty acids intake (% Kcal)        | -0.216 | 0.043  | 70 | 31      | 0.000 | 0.000 |
| k_Bacteria.p_Bacteroidetes.c_Bacteroidia.o_Bacteroidales.f_Bacteroidaceae.g_Bacteroides                  | Saturated fatty acids intake (% Kcal)        | -0.817 | 0.297  | 70 | 67      | 0.006 | 0.050 |
| k_Bacteria.p_Bacteroidetes.c_Bacteroidia.o_Bacteroidales.f_Paraprevotellaceae.g_                         | Poly unsaturated fatty acids intake (% Kcal) | -0.355 | 0.055  | 70 | 18      | 0.000 | 0.000 |
| k_Bacteria.p_Firmicutes.c_Clostridia.o_Clostridiales.f_Mogibacteriaceae.g_Mogibacterium                  | Poly unsaturated fatty acids intake (% Kcal) | 0.129  | 0.033  | 70 | 31      | 0.000 | 0.001 |
| k_Bacteria.p_Bacteroidetes.c_Bacteroidia.o_Bacteroidales.f_Odoribacteraceae.g_Odoribacter                | Poly unsaturated fatty acids intake (% Kcal) | -1.373 | 0.437  | 70 | 21      | 0.002 | 0.020 |
| k_Bacteria.p_Bacteroidetes.c_Bacteroidia.o_Bacteroidales.f_Bacteroidaceae.g_Bacteroides                  | Poly unsaturated fatty acids intake (% Kcal) | -0.665 | 0.227  | 70 | 67      | 0.003 | 0.035 |
| k_Bacteria.p_Bacteroidetes.c_Bacteroidia.o_Bacteroidales.f_Rikenellaceae.g_                              | Poly unsaturated fatty acids intake (% Kcal) | -1.399 | 0.483  | 70 | 18      | 0.004 | 0.036 |
| k_Bacteria.p_Firmicutes.c_Bacilli.o_Lactobacillales.f_Lactobacillaceae.g_Lactobacillus                   | Poly unsaturated fatty acids intake (% Kcal) | 0.664  | 0.232  | 70 | 66      | 0.004 | 0.039 |

|                                                                                                          |                                              |        |       |    |    |       |       |
|----------------------------------------------------------------------------------------------------------|----------------------------------------------|--------|-------|----|----|-------|-------|
| k_Bacteria.p_Actinobacteria.c_Coriobacteriia.o_Coriobacteriales.f_Coriobacteriaceae.g_Atopobium parvulum | Poly unsaturated fatty acids intake (% Kcal) | 0.895  | 0.344 | 70 | 25 | 0.009 | 0.076 |
| k_Bacteria.p_Bacteroidetes.c_Bacteroidia.o_Bacteroidales.f_Paraprevotellaceae.g_                         | Mono unsaturated fatty acids intake (% Kcal) | -0.392 | 0.089 | 70 | 18 | 0.000 | 0.000 |
| k_Bacteria.p_Actinobacteria.c_Coriobacteriia.o_Coriobacteriales.f_Coriobacteriaceae.g_                   | Mono unsaturated fatty acids intake (% Kcal) | 0.166  | 0.046 | 70 | 33 | 0.000 | 0.004 |
| k_Bacteria.p_Actinobacteria.c_Coriobacteriia.o_Coriobacteriales.f_Coriobacteriaceae.g_Atopobium parvulum | Mono unsaturated fatty acids intake (% Kcal) | 1.522  | 0.503 | 70 | 25 | 0.002 | 0.028 |

Supplementary Table S5. Bacterial composition in the high SES group.

|                                              | Unweighted UniFrac |          |       |       |         | Weighted UniFrac |          |       |       |         |
|----------------------------------------------|--------------------|----------|-------|-------|---------|------------------|----------|-------|-------|---------|
|                                              | Df                 | SumofSqs | R2    | F     | p-value | Df               | SumofSqs | R2    | F     | p-value |
| Body mass index Z-score                      | 1                  | 0.225    | 0.018 | 1.290 | 0.131   | 1                | 0.035    | 0.024 | 1.616 | 0.162   |
| Fat intake (% Kcal)                          | 1                  | 0.189    | 0.015 | 1.083 | 0.332   | 1                | 0.003    | 0.002 | 0.139 | 0.989   |
| Poly unsaturated fatty acids intake (% Kcal) | 1                  | 0.463    | 0.037 | 2.653 | 0.001   | 1                | 0.029    | 0.020 | 1.331 | 0.217   |
| Mono unsaturated fatty acids intake (% Kcal) | 1                  | 0.216    | 0.017 | 1.236 | 0.181   | 1                | 0.006    | 0.004 | 0.258 | 0.957   |
| Saturated fatty acids intake (% Kcal)        | 1                  | 0.231    | 0.018 | 1.325 | 0.121   | 1                | 0.029    | 0.020 | 1.334 | 0.225   |
| Protein intake (% Kcal)                      | 1                  | 0.196    | 0.016 | 1.123 | 0.275   | 1                | 0.009    | 0.006 | 0.408 | 0.848   |
| Carbohydrates intake (% Kcal)                | 1                  | 0.170    | 0.014 | 0.977 | 0.443   | 1                | 0.013    | 0.009 | 0.588 | 0.711   |
| Residual                                     | 62                 | 10.813   | 0.865 | NA    | NA      | 62               | 1.335    | 0.916 | NA    | NA      |
| Total                                        | 69                 | 12.502   | 1.000 | NA    | NA      | 69               | 1.457    | 1.000 | NA    | NA      |

Adonis2 was implemented, with 1,000 permutations.

Supplementary Table S6. Maaslin2 results for the high SES group.

| feature                                                                                        | metadata                                     | coef   | stderr | N  | N.not.0 | pval  | qval  |
|------------------------------------------------------------------------------------------------|----------------------------------------------|--------|--------|----|---------|-------|-------|
| k_Bacteria.p_Firmicutes.c_Clostridia.o_Clostridiales.f_Lachnospiraceae.g_                      | Body mass index Z-score                      | 0.390  | 0.101  | 69 | 69      | 0.000 | 0.014 |
| k_Bacteria.p_Firmicutes.c_Bacilli.o_Turicibacteriales.f_Turicibacteraceae.g_Turicibacter       | Body mass index Z-score                      | -0.451 | 0.157  | 69 | 63      | 0.004 | 0.073 |
| k_Bacteria.p_Bacteroidetes.c_Bacteroidia.o_Bacteroidales.f_Porphyromonadaceae.g_Barnesiella    | Carbohydrates intake (% Kcal)                | -7.862 | 2.375  | 69 | 19      | 0.001 | 0.035 |
| k_Bacteria.p_Firmicutes.c_Bacilli.o_Lactobacillales.f_Streptococcaceae.g_Lactococcus           | Carbohydrates intake (% Kcal)                | 7.354  | 2.355  | 69 | 27      | 0.002 | 0.039 |
| k_Bacteria.p_Bacteroidetes.c_Bacteroidia.o_Bacteroidales.f_Porphyromonadaceae.g_Barnesiella    | Protein intake (% Kcal)                      | -4.273 | 1.304  | 69 | 19      | 0.001 | 0.035 |
| k_Bacteria.p_Firmicutes.c_Bacilli.o_Lactobacillales.f_Streptococcaceae.g_Lactococcus           | Protein intake (% Kcal)                      | 3.988  | 1.241  | 69 | 27      | 0.001 | 0.035 |
| k_Bacteria.p_Bacteroidetes.c_Bacteroidia.o_Bacteroidales.f_Porphyromonadaceae.g_Barnesiella    | Fat intake (% Kcal)                          | -8.109 | 2.215  | 69 | 19      | 0.000 | 0.015 |
| k_Bacteria.p_Firmicutes.c_Clostridia.o_Clostridiales.f_Lachnospiraceae.g_Lachnobacterium       | Poly unsaturated fatty acids intake (% Kcal) | 2.378  | 0.618  | 69 | 18      | 0.000 | 0.014 |
| k_Bacteria.p_Bacteroidetes.c_Bacteroidia.o_Bacteroidales.f_Porphyromonadaceae.g_Barnesiella    | Poly unsaturated fatty acids intake (% Kcal) | 1.593  | 0.500  | 69 | 19      | 0.001 | 0.035 |
| k_Bacteria.p_Firmicutes.c_Bacilli.o_Lactobacillales.f_Carnobacteriaceae.g_                     | Poly unsaturated fatty acids intake (% Kcal) | 1.230  | 0.386  | 69 | 24      | 0.001 | 0.035 |
| k_Bacteria.p_Bacteroidetes.c_Bacteroidia.o_Bacteroidales.f_Paraprevotellaceae.g_Paraprevotella | Mono unsaturated fatty acids intake (% Kcal) | 2.790  | 0.969  | 69 | 18      | 0.004 | 0.073 |

Supplementary Table S7. Maaslin2 results for the participants with obesity.

| feature                                                                                        | metadata                                     | coef   | stderr | N  | N.not.0 | pval  | qval  |
|------------------------------------------------------------------------------------------------|----------------------------------------------|--------|--------|----|---------|-------|-------|
| k__Bacteria.p__Bacteroidetes.c__Bacteroidia.o__Bacteroidales.f__Paraprevotellaceae..g__        | Fat intake (% Kcal)                          | 0.511  | 0.167  | 79 | 16      | 0.002 | 0.064 |
| k__Bacteria.p__Bacteroidetes.c__Bacteroidia.o__Bacteroidales.f__Barnesiellaceae..g__           | Poly unsaturated fatty acids intake (% Kcal) | -1.450 | 0.413  | 79 | 33      | 0.000 | 0.029 |
| k__Bacteria.p__Firmicutes.c__Clostridia.o__Clostridiales.f__Mogibacteriaceae..g__Mogibacterium | Poly unsaturated fatty acids intake (% Kcal) | 1.369  | 0.436  | 79 | 33      | 0.002 | 0.064 |
| k__Bacteria.p__Bacteroidetes.c__Bacteroidia.o__Bacteroidales.f__Barnesiellaceae..g__           | Saturated fatty acids intake (% Kcal)        | -2.300 | 0.570  | 79 | 33      | 0.000 | 0.005 |
| k__Bacteria.p__Bacteroidetes.c__Bacteroidia.o__Bacteroidales.f__Paraprevotellaceae..g__        | Mono unsaturated fatty acids intake (% Kcal) | -0.469 | 0.094  | 79 | 16      | 0.000 | 0.000 |
| k__Bacteria.p__Firmicutes.c__Clostridia.o__Clostridiales.f__Ruminococcaceae.g__Ruminococcus    | Mono unsaturated fatty acids intake (% Kcal) | -0.611 | 0.189  | 79 | 79      | 0.001 | 0.060 |
| k__Bacteria.p__Firmicutes.c__Clostridia.o__Clostridiales.f__Mogibacteriaceae..g__Mogibacterium | Mono unsaturated fatty acids intake (% Kcal) | 1.908  | 0.627  | 79 | 33      | 0.002 | 0.064 |
